# Supplementary material
Source: publisher figshare collection journal article supplement (https://acs.figshare.com/ndownloader/files/5226004)
Supplement: Supplementary file 1 [file 5226004]

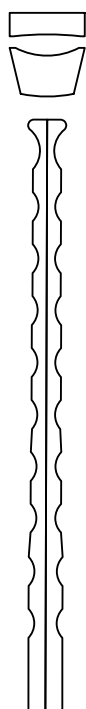

working range for refractive  
index  $1.41 < n < 1.56$ ;  
optimized for fiber optics with  
 $NA = 0.22$ ;  
self-alignment channel  
adapted to 125  $\mu\text{m}$  cladding  
diameter
